# Supplementary material for: Use of Intranasal Analgesia in Military Setting: a French Cross Sectional Survey
Source: Research Square preprint supplement (doi:10.21203/rs.3.rs-184043/v1), 2021-02-03
Supplement: Supplementary file 1 [file a094fd577b54dc6d4277ae0d.docx]

**Use of intranasal analgesia in military setting: a French cross sectional survey**

1. **Biographical information**
2. Gender

Male

Female

1. Age:
2. How many years have you practiced since graduation?

< 5 years

5 to 10 years

10 to 15 years

>15 years

1. Do you have additional training in emergency medicine?

CAMU

DESC

No additional training

5)a) Do you work on-call in an emergency structure?

In an emergency department (ED)

Prehospital on-call

ED and Prehospital on-call

No

5)b) If yes, how often?

1 to 2 times per month

3 à 5 times per month

>5 times per month

6.How many times have you been on deployment / mission abroad (> 2 months)?

0 to 2 times

2 to 6 times

6 to 8 times

8 to 10 times

>10 times

7. Which army/unit do you primarily support?

Army

Army: paratroopers

Army: mountain troops

Air force

Air force: Search and rescue

Air force: emergency medical evacuation

Navy: onboard station

Navy: ground station

Navy: Search and rescue

Gendarmerie (= Military police department)

Paris fire department (BSPP) or Marseille fire department (BMPM)

Civil Security

Special forces

Physician in an ED

Command center / management position

Other unit:

1. **Knowledge of intranasal route for analgesia**

8)a) Are you familiar with intranasal analgesia for pain control in a trauma patient?

Yes

No

8)b) How did you acquire this knowledge?

civilian scientific articles

military scientific articles

communication in a congress

Other:

8)c) Do you know the intranasal bioavailability of ketamine?

0-25%

25-50%

50-75%

75-100%

No

8)c) Do you know the intranasal bioavailability of sufentanil?

0-25%

25-50%

50-75%

75-100%

No

8)c) Do you know the intranasal bioavailability of fentanyl?

0-25%

25-50%

50-75%

75-100%

No

9. Do you know the delay of action for intranasal ketamine and opioids?

< 1 minute

1 to 15 minutes

15 to 30 minutes

30 to 60 minutes

>60 minutes

Non

10. Do you know the MAD Nasal Device (Muconasal Atomization Device Teleflex)?

Yes

No

11. Are you interested in an intranasal training course?

Yes

No

1. **Use of intranasal route for analgesia**

12)a) Have you ever used the intranasal route for analgesia?

Yes

No

12)b) If yes:

In France: prehospital practice

In France: At the medical antenna or during medical support

During a mission: traumatic injury

During a mission: war wounded

12) c) Which molecules have you already used?

Ketamine

Sufentanil

Fentanyl

Other:

12)d) Have you ever observed any side effects with ketamine?

Neuropsychological

Hemodynamics

Respiratory

Difficulty in carrying out analgesia

None

12)d) Have you ever observed any side effects with opioids?

Neuropsychological

Hemodynamics

Respiratory

Difficulty in carrying out analgesia

None

13)a) In general, is additional analgesia necessary after using the intranasal route?

Yes

No

13)b) if yes:

Subcutaneous

Intravenous

*Per os*

1. **Importance of the intranasal route for analgesia in your practice:**

14. Are you interested in intranasal analgesia for pain control in a traumatic patient?

No

Yes, in France

Yes, during deployment / mission abroad

Yes, in France and during deployment / missions abroad

15. If an intranasal administration device, like the MAD Nasal device, was available in the catalog in which situations would you use it?

At the medical center

When supporting high-risk activities

In an austere environment (mountain, jungle...)

During deployment / missions abroad

Multi-victim situation

16. If an intranasal delivery device was available in the catalog, what would be its place in your opinion?

Individual fighter kit

Used by a combat medic

Used by a nurse

Use limited to the doctor
